# Supplementary material for: Bevacizumab for Newly Diagnosed Ovarian Cancers: Best Candidates Among High-Risk Disease Patients (ICON-7)
Source: PubMed Central journal article supplement (PMC7306189; doi:10.1093/jncics/pkaa026), 2020-04-04
Supplement: pkaa026_supplementary_data.pdf [file pkaa026_supplementary_data.pdf]

Supplementary Table 1. Outcomes of the prognostic value of Std KELIM and other covariates using univariate and multivariate survival analyses (Log-rank and Cox Proportional Hazard Ratio model) in the whole population.

| Covariates           | Classes                    | N               | Univariate |           |           | Multivariate |           |           |        |
|----------------------|----------------------------|-----------------|------------|-----------|-----------|--------------|-----------|-----------|--------|
|                      |                            |                 | OS         | 95% CI    | P         | HR           | 95% CI    | P         |        |
| Std KELIM (class)    | Unfavorable                | Std KELIM < 1.0 | 589        | 34.6      | 31.0-38.8 | <0.001       | REF       | 0.41-0.57 | <0.001 |
|                      | Favorable                  | Std KELIM ≥ 1.0 | 797        | 65.0      | 61.5-NR   |              | 0.49      |           |        |
| Arm                  | Chemotherapy alone         | 677             | 54.7       | 49.5-NR   | 0.98      | -            |           |           |        |
|                      | Chemotherapy + bevacizumab | 709             | 53.9       | 49.5-61.8 |           |              |           |           |        |
| FIGO stage           | I-II                       | 251             | NR         | NR- NR    | <0.001    | NS           |           |           |        |
|                      | III                        | 957             | 48.2       | 44.3-51.7 |           |              |           |           |        |
|                      | IV                         | 178             | 32.4       | 27.5-38.7 |           |              |           |           |        |
| Histology            | Clear cell                 | 116             | 61.5       | 61.5-NR   | 0.07      | -            |           |           |        |
|                      | Others                     | 1270            | 53.1       | 49.5-59.2 |           |              |           |           |        |
| GCIG CA-125 Response | Unfavorable                | 429             | 61.5       | 59.1-NR   | <0.01     | NS           |           |           |        |
|                      | Favorable                  | 936             | 50.1       | 47.5-55.8 |           |              |           |           |        |
| Grade                | 1+2                        | 368             | 53.9       | 50.3-NR   | 0.88      | -            |           |           |        |
|                      | 3                          | 998             | 54.7       | 49.5-61.8 |           |              |           |           |        |
| High-risk disease    | No                         | 928             | 65.0       | 61.8-NR   | <0.001    | REF          | REF       | <0.001    |        |
|                      | Yes                        | 458             | 32.4       | 29.7-35.5 |           | 2.19         | 1.87-2.56 |           |        |

Std KELIM (class): standardized KELIM in class; OS : overall survival (months) ; 95% CI : 95% confidence interval; HR : Cox Hazard ratio ; REF : reference ; NR : not reached ; NS : not significant

Supplementary Table 2. Outcomes of the prognostic value of Std KELIM and other covariates using univariate and multivariate survival analyses (Log-rank and Cox Proportional Hazard Ratio model) in the sub-population of high-risk disease patients.

| N=458                |             |               | Univariate |           |           | Multivariate |           |           |        |
|----------------------|-------------|---------------|------------|-----------|-----------|--------------|-----------|-----------|--------|
| Covariates           | Classes     | N             | OS         | 95% CI    | P         | HR           | 95% CI    | P         |        |
| Std KELIM (class)    | Unfavorable | Std KELIM < 1 | 244        | 23.6      | 21.3-28.2 | <0.001       | REF       | REF       | <0.001 |
|                      | Favorable   | Std KELIM ≥ 1 | 214        | 46.7      | 39.6-53.5 |              | 0.48      | 0.38-0.60 |        |
| Arm                  | CP          | 223           | 28.9       | 23.9-33.9 | 0.09      | -            | -         | -         |        |
|                      | CP + Beva   | 235           | 35.2       | 32.4-40.4 |           | -            | -         | -         |        |
| Histology            | Clear cell  | 12            | 19.4       | 12.9-NR   | 0.10      | REF          | REF       | 0.05      |        |
|                      | Others      | 446           | 32.8       | 29.9-35.8 |           | 0.50         | 0.26-0.99 |           |        |
| GCIG CA-125 Response | Unfavorable | 98            | 31.0       | 22.8-38.5 | 0.30      | -            | -         | -         |        |
|                      | Favorable   | 350           | 32.4       | 29.7-37.0 |           | -            | -         | -         |        |
| Grade                | 1+2         | 115           | 32.4       | 29.2-46.6 | 0.80      | -            | -         | -         |        |
|                      | 3           | 335           | 33.9       | 27.9-36.9 |           | -            | -         | -         |        |

Std KELIM (class): standardized KELIM in class; OS: Overall survival (months); 95% CI: 95% confidence interval; REF: reference

Supplementary Table 3. Outcomes of the non-censored overall survival (OS) analyses on dead patients with low-risk or high-risk diseases as per Oza et al., in ICON-7 trial according to treatment arms, and std KELIM (favorable  $\geq 1.0$ , vs unfavorable  $< 1.0$ ).<sup>4</sup>

| N = 651 Death event<br>(735 censored) | Treatment arm                 | Low risk disease group (Death event, n=351) |                    |            |      | High risk disease group (Death event, n=300) |                    |            |      |
|---------------------------------------|-------------------------------|---------------------------------------------|--------------------|------------|------|----------------------------------------------|--------------------|------------|------|
|                                       |                               | Number of<br>Death Event                    | Median OS<br>(IQR) | Statistics |      | Number of<br>Death Event                     | Median OS<br>(IQR) | Statistics |      |
|                                       |                               |                                             |                    | Wilcoxon   | F    |                                              |                    | Wilcoxon   | F    |
| Favorable std<br>KELIM $\geq 1.0$     | Chemotherapy +<br>bevacizumab | 98                                          | 33 (20)            | 0.57       | 0.36 | 62                                           | 27 (16)            | 0.73       | 0.52 |
|                                       | Chemotherapy alone            | 81                                          | 32 (24)            |            |      | 55                                           | 27 (22)            |            |      |
| Unfavorable std<br>KELIM $< 1.0$      | Chemotherapy +<br>bevacizumab | 89                                          | 21 (16)            | 0.07       | 0.95 | 87                                           | 22 (22)            | 0.004      | 0.36 |
|                                       | Chemotherapy alone            | 83                                          | 26 (19)            |            |      | 96                                           | 17 (15)            |            |      |

OS: Overall survival in months; IQR: interquartile range; Wilcoxon: Wilcoxon test (P-value); F: homogeneity test of variance (P-value)
